# MIND TO MIND

Creative writing that explores the abstract side of our profession and our lives

*Stephen T. Harvey, M.D., Editor*

## Imperfect

Erik Bruce Smith, M.D., J.D., M.S.

W when you make a mistake  
and we all will  
  
it will haunt you  
you'll worry  
second guess everything  
cry  
  
but it is all  
because you care

From the Department Anesthesiology and Critical Care Medicine, Johns Hopkins Hospital, Baltimore, Maryland. erik@jhmi.edu.

Accepted for publication January 23, 2020. Published online first on February 19, 2020.

Permission to reprint granted to the American Society of Anesthesiologists, Inc. by copyright author/owner. Anesthesiology 2020; 132:1278. DOI: 10.1097/ALN.0000000000003203
